# Supplementary material
Source: PubMed Central journal article supplement (PMC4677884)
Supplement: supp_pp.15.00806_PP2015-00806R2_Supplemental_Figure_1.pdf [file supp_pp.15.00806_PP2015-00806R2_Supplemental_Figure_1.pdf]

### A Expression of WT REV3 constructs

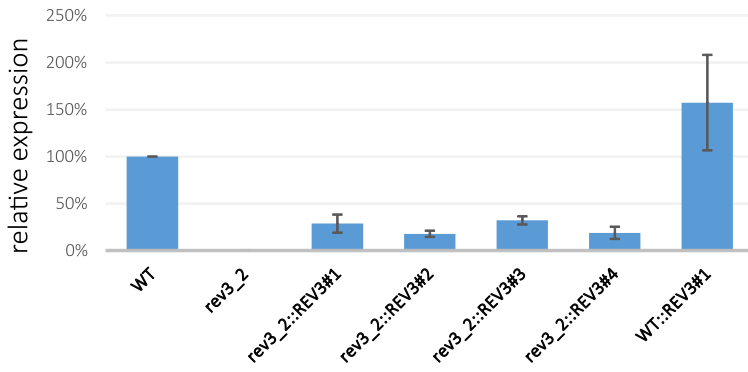

|                      | rev3_2 | WT#1  | WT#2  | WT#3  | WT#4  | control |
|----------------------|--------|-------|-------|-------|-------|---------|
| p-value to wild type | 0,000  | 0,006 | 0,001 | 0,001 | 0,002 | 0,189   |
| p-value to rev3_2    |        | 0,035 | 0,011 | 0,006 | 0,036 | 0,033   |
| p-value to WT#1      |        |       | 0,180 | 0,620 | 0,225 | 0,044   |
| p-value to WT#2      |        |       |       | 0,013 | 0,815 | 0,041   |
| p-value to WT#3      |        |       |       |       | 0,049 | 0,050   |
| p-value to WT#4      |        |       |       |       |       | 0,040   |

### B Expression of REV3 D1385A constructs

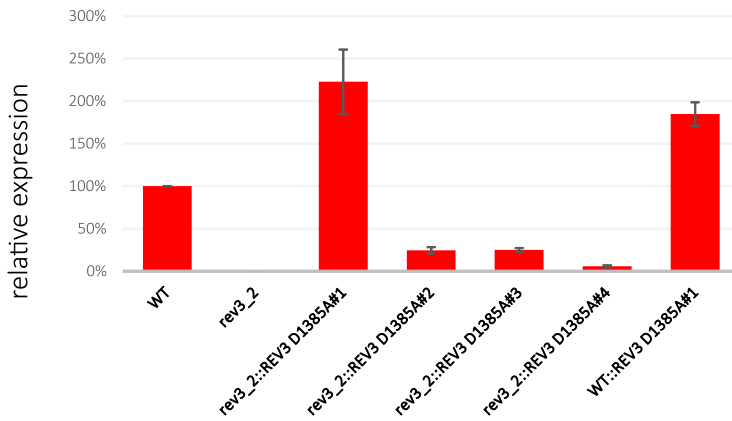

|                      | rev3_2 | D1385A#1 | D1385A#2 | D1385A#3 | D1385A#4 | control |
|----------------------|--------|----------|----------|----------|----------|---------|
| p-value to wild type | 0,000  | 0,030    | 0,001    | 0,000    | 0,000    | 0,009   |
| p-value to rev3_2    |        | 0,009    | 0,008    | 0,002    | 0,012    | 0,002   |
| p-value to D1385A#1  |        |          | 0,011    | 0,012    | 0,010    | 0,217   |
| p-value to D1385A#2  |        |          |          | 0,836    | 0,008    | 0,001   |
| p-value to D1385A#3  |        |          |          |          | 0,001    | 0,002   |
| p-value to D1385A#4  |        |          |          |          |          | 0,002   |

### C Expression of REV3 D1549A constructs

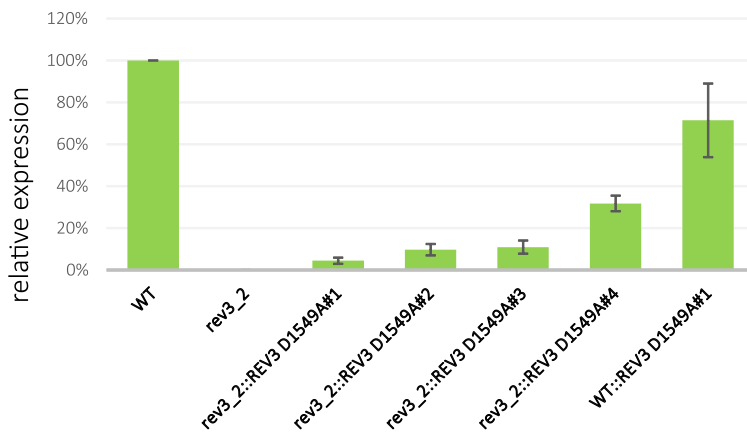

|                      | rev3_2 | D1549A#1 | D1549A#2 | D1549A#3 | D1549A#4 | control |
|----------------------|--------|----------|----------|----------|----------|---------|
| p-value to wild type | 0,000  | 0,000    | 0,000    | 0,000    | 0,001    | 0,106   |
| p-value to rev3_2    |        | 0,034    | 0,025    | 0,025    | 0,005    | 0,020   |
| p-value to D1549A#1  |        |          | 0,059    | 0,050    | 0,002    | 0,022   |
| p-value to D1549A#2  |        |          |          | 0,633    | 0,002    | 0,024   |
| p-value to D1549A#3  |        |          |          |          | 0,002    | 0,024   |
| p-value to D1549A#4  |        |          |          |          |          | 0,054   |

## Supplemental Figure 1: Expression levels of the REV3, REV3 D1385A and REV3 D1549A constructs

Expression of REV3 constructs was measured via qRT PCR. As expected, no expression was measurable in the *rev3-2* mutant. The data are the results of three independent biological replicates. In the tables are the respective p-values for a Student's t-test shown.
